# Supplementary material for: Metal–organic framework derived metal oxide/reduced graphene oxide nanocomposite, a new tool for the determination of dipyridamole
Source: Royal Society of Chemistry journal article supplement (doi:10.1039/d0nj05329e), 2020-12-30
Supplement: d0nj05329e1.pdf [file d0nj05329e1.pdf]

## Electronic Supporting Material

**A voltammetry sensor based on metal-organic framework derived metal  
oxide/reduced graphene oxide nanocomposite for the determination of  
dipyridamole**

**N. Salandari-Jolge, Ali A. Ensafi\*, B. Rezaei**

*Department of Chemistry, Isfahan University of Technology, Isfahan 84156-83111, Iran*

---

\*Corresponding author: Fax: +98-31-33912350; Tel.: +98-31-33913269; Email: Ensafi@cc.iut.ac.ir,

Ensafi@yahoo.com; aaensafi@gmail.com

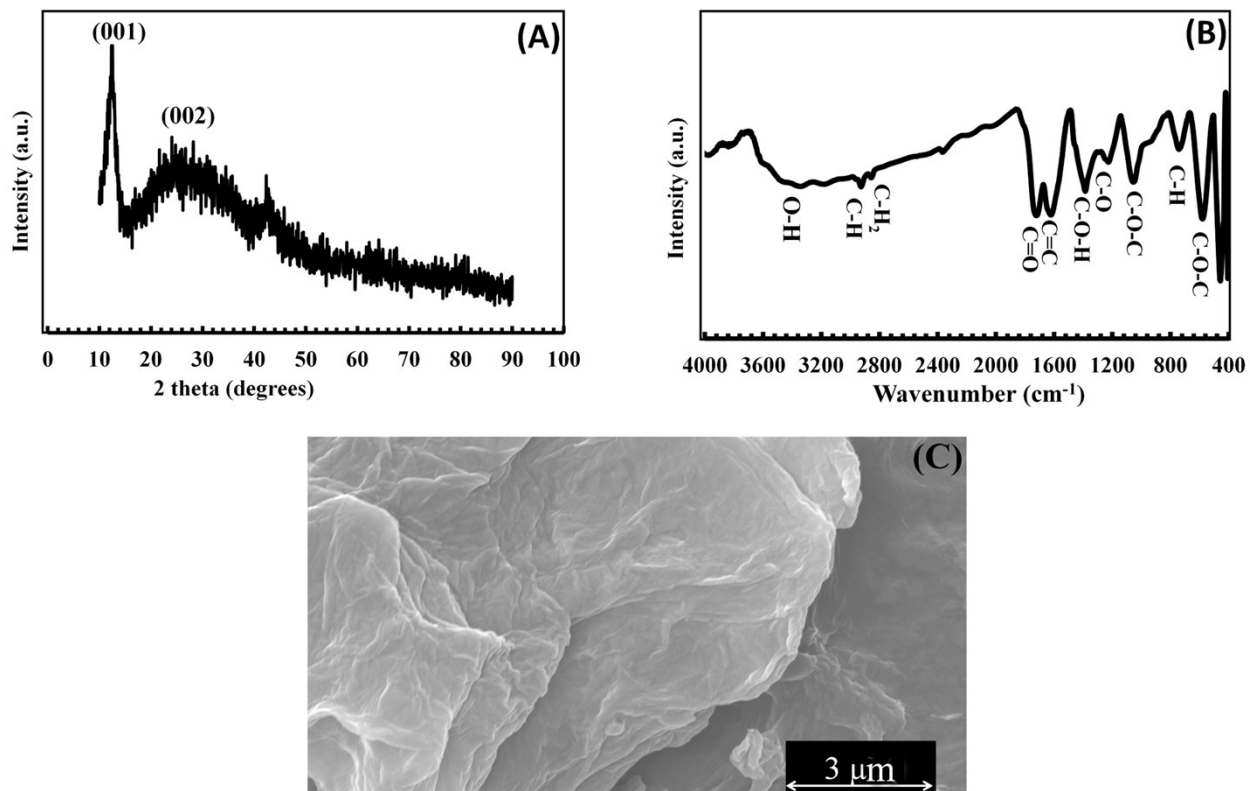

**Fig. S1** (A) XRD pattern, (B) FT-IR, and (C) FE-SEM of GO

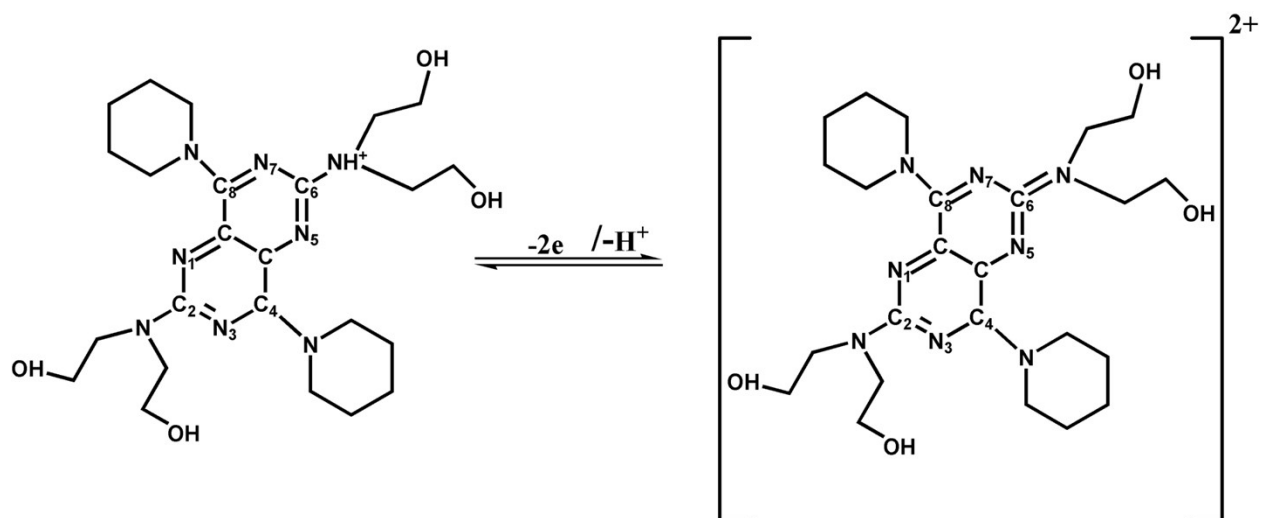

**Scheme S1** The oxidation mechanism of DIP on the NiCo<sub>2</sub>O<sub>4</sub>/NiO@MOF-5/rGO -1/GCE.

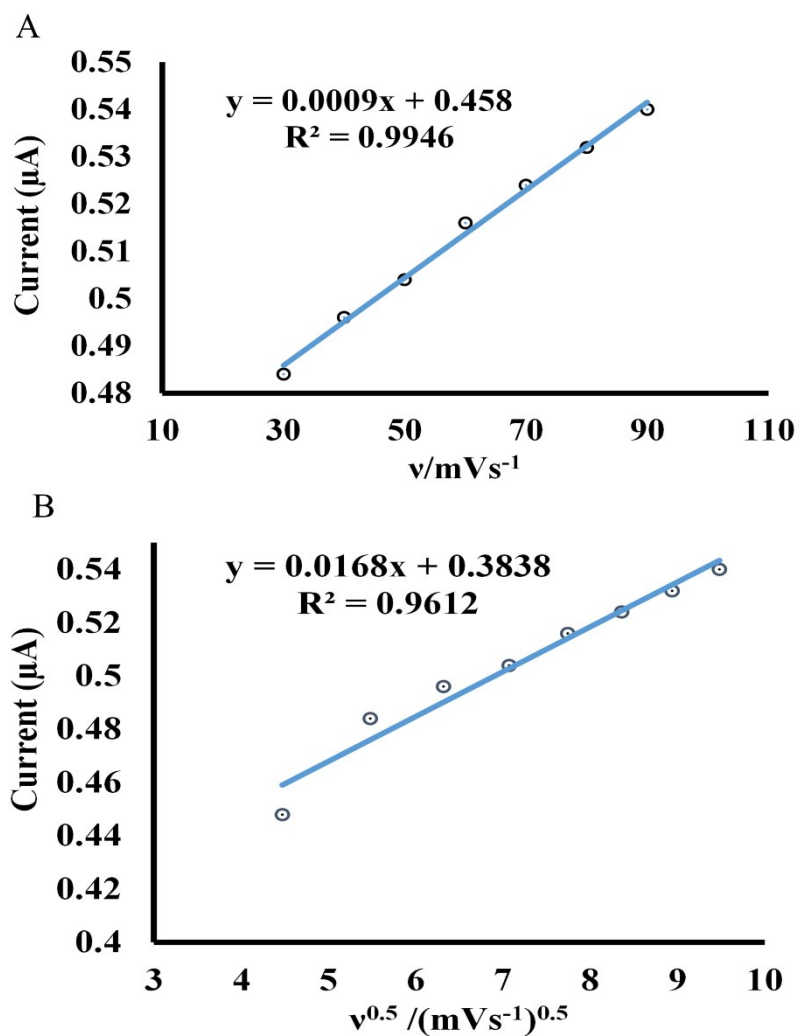

Fig. S2 (A) peak currents of 50.0  $\mu\text{M}$  DIP vs. scan rate and (B) square root of scan rate

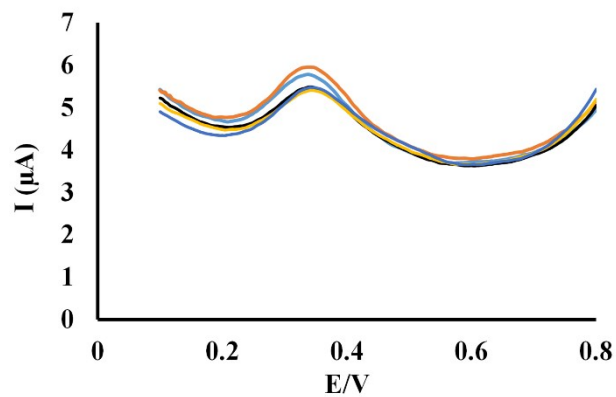

**Fig. S3** DPVs of five separate electrodes for determining 2.0 µM DIP.

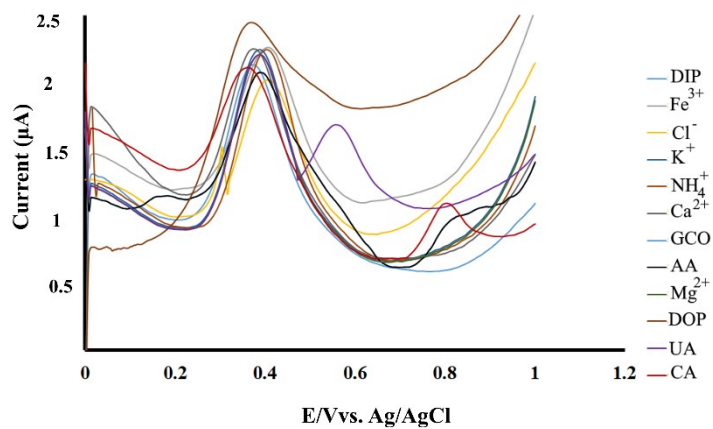

**Fig. S4** DPVs of 2.0 µM DIP detection in presence common potential interfering species.

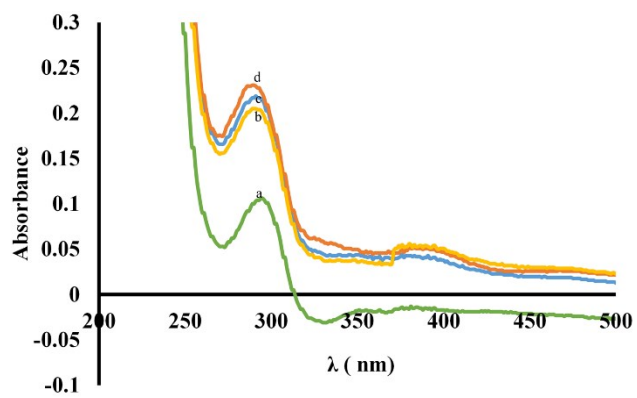

**Fig. S5** UV-Vis spectra of (a) real sample and (b, c and d) real sample and standard addition of MTX.
